# Supplementary material for: Chimeric Stimuli-Responsive Liposomes as Nanocarriers for the Delivery of the Anti-Glioma Agent TRAM-34
Source: MDPI journal article supplement (doi:10.3390/ijms22126271), 2021-06-10
Supplement: s1 [file s1]

## Supporting Information

# Chimeric Stimuli-Responsive Liposomes as Nanocarriers for the Delivery of the Anti-Glioma Agent TRAM-34

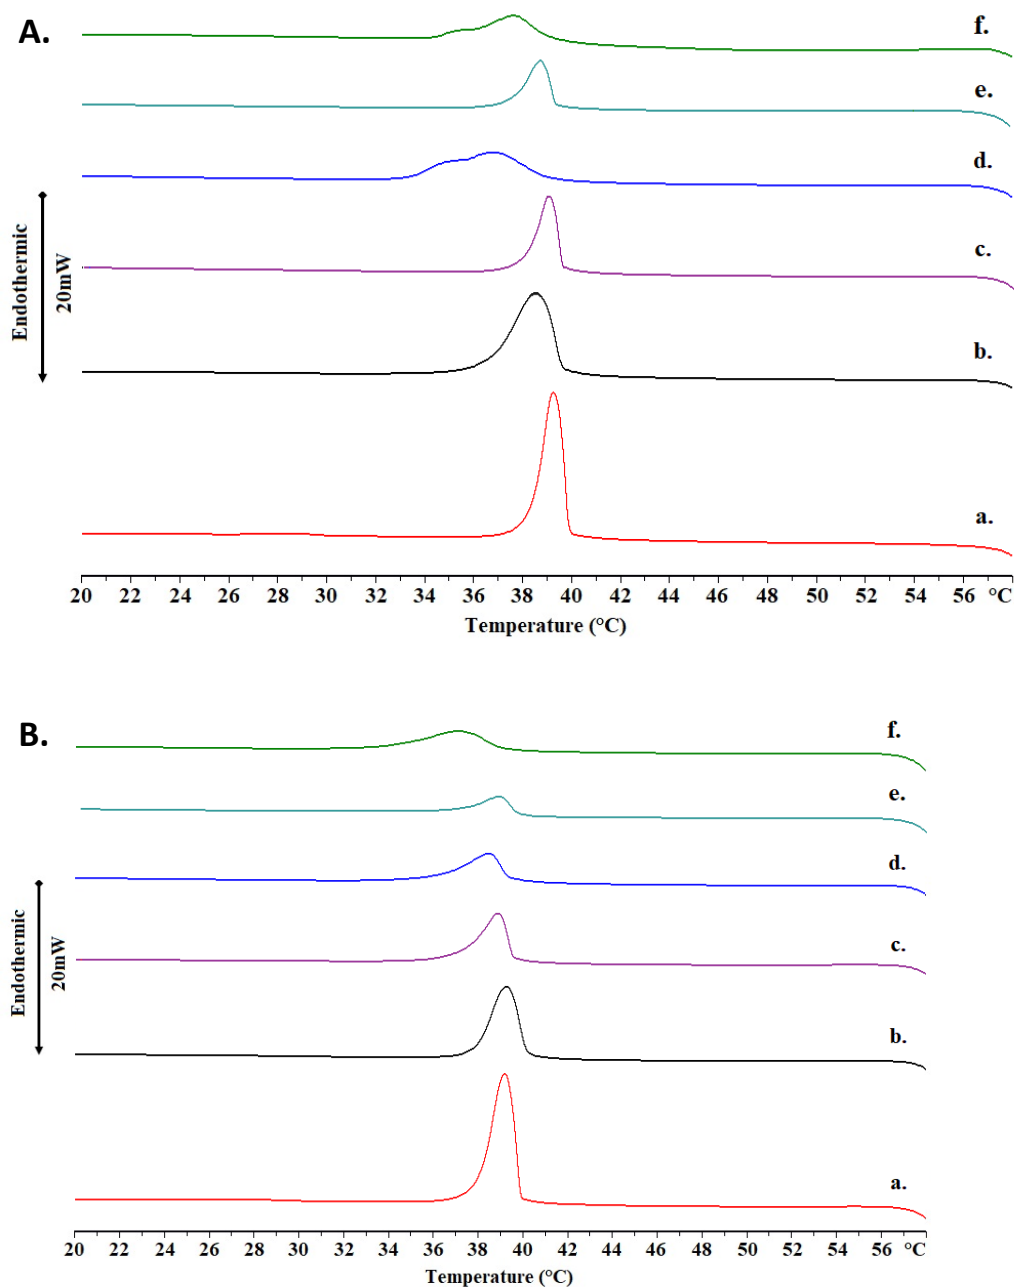

**Figure 1.** DSC cooling curves in A. PBS (pH = 7.4) and B. citrate buffer (pH = 4.5) of a. DPPC, b. DPPC:Tram-34, c. DPPC:PDMAEMA-b-PLMA 1, d. DPPC:PDMAEMA-b-PLMA 1:Tram-34, e. DPPC:PDMAEMA-b-PLMA 2 and f. DPPC:PDMAEMA-b-PLMA 2:Tram-34.

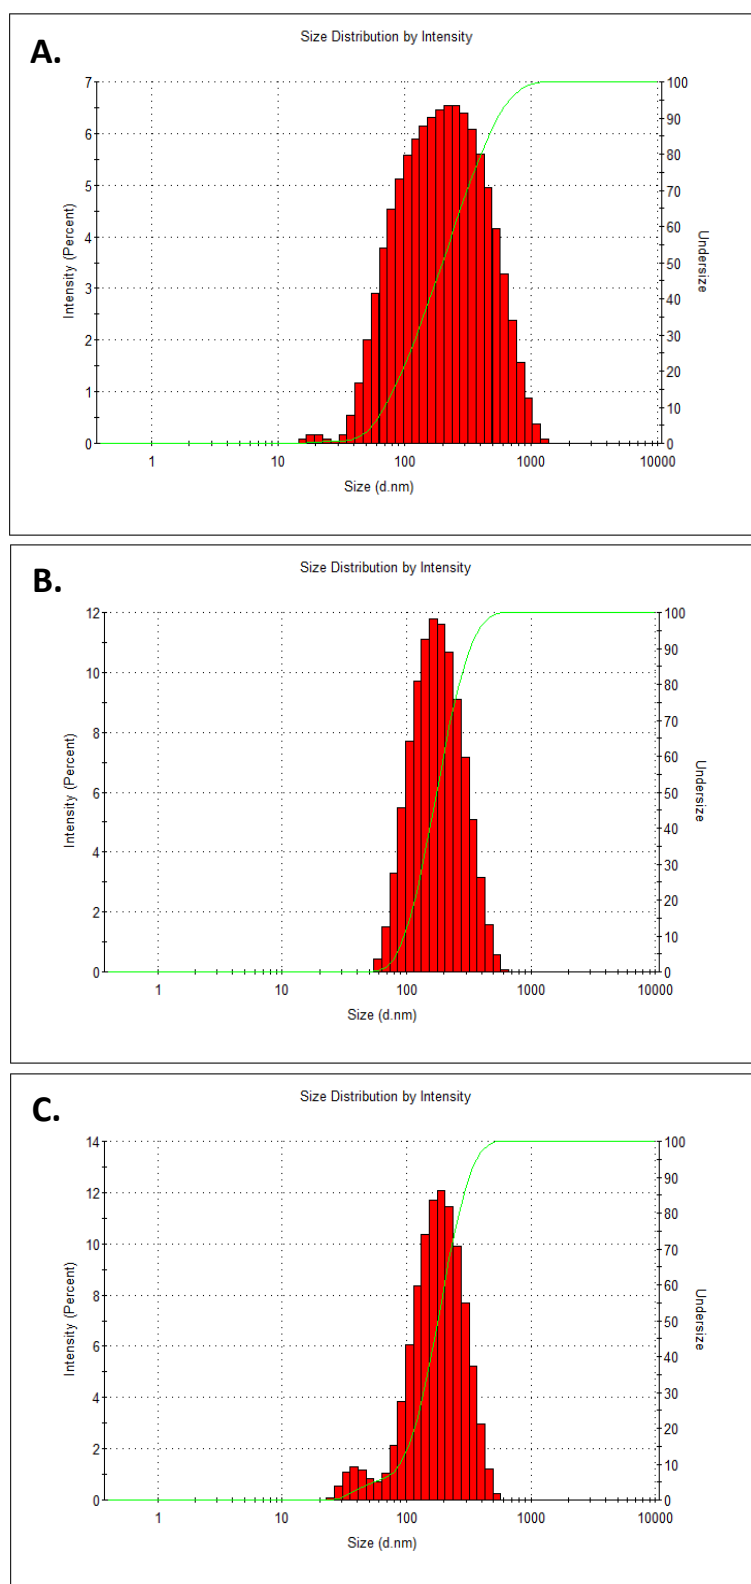

**Figure S2.** Size distributions from DLS, based on the scattered intensity of nanoparticles of A. EPC, B. EPC:PDMAEMA-b-PLMA 1 and C. EPC:PDMAEMA-b-PLMA 2.

**Table S1.** Calorimetric heating and cooling profiles of chimeric bilayers in PBS (pH = 7.4) and acidic environment (pH = 4.5).

| Sample                      | Process | Dispersion Medium | T <sub>onset,m</sub><br>(°C) | T <sub>m</sub><br>(°C) | ΔT <sub>1/2,m</sub><br>(°C) | ΔH <sub>m</sub><br>(J g <sup>-1</sup> ) | T <sub>onset,s</sub><br>(°C) | T <sub>s</sub><br>(°C) | ΔT <sub>1/2,s</sub><br>(°C) | ΔH <sub>s</sub><br>(J g <sup>-1</sup> ) |
|-----------------------------|---------|-------------------|------------------------------|------------------------|-----------------------------|-----------------------------------------|------------------------------|------------------------|-----------------------------|-----------------------------------------|
| DPPC                        | Heating | PBS (pH=7.4)      | 40.78                        | 41.33                  | 0.90                        | -53.11                                  | 34.49                        | 36.44                  | 1.88                        | 7.18                                    |
| DPPC:Tram-34                | Heating | PBS (pH=7.4)      | 39.27                        | 40.89                  | 1.47                        | -56.96                                  | -                            | -                      | -                           | -                                       |
| DPPC:PDMAEMA-b-PLA3         | Heating | PBS (pH=7.4)      | 40.48                        | 41.05                  | 0.90                        | -28.42                                  | 32.97                        | 35.42                  | 2.55                        | 1.73                                    |
| DPPC:PDMAEMA-b-PLA3:Tram-34 | Heating | PBS (pH=7.4)      | 37.32                        | 39.68                  | 2.76                        | -34.17                                  | -                            | -                      | -                           | -                                       |
| DPPC:PDMAEMA-b-PLA4         | Heating | PBS (pH=7.4)      | 40.44                        | 41.11                  | 0.99                        | -19.87                                  | 33.98                        | 35.94                  | 2.42                        | 0.96                                    |
| DPPC:PDMAEMA-b-PLA4:Tram-34 | Heating | PBS (pH=7.4)      | 38.38                        | 40.14                  | 1.66                        | -24.94                                  | -                            | -                      | -                           | -                                       |
| DPPC                        | Heating | pH=4.5            | 40.95                        | 41.53                  | 1.07                        | -60.34                                  | 33.79                        | 35.58                  | 2.27                        | 5.69                                    |
| DPPC:Tram-34                | Heating | pH=4.5            | 40.56                        | 41.50                  | 1.03                        | -39.57                                  | -                            | -                      | -                           | -                                       |
| DPPC:PDMAEMA-b-PLA3         | Heating | pH=4.5            | 39.96                        | 40.98                  | 1.12                        | -37.96                                  | -                            | -                      | -                           | -                                       |
| DPPC:PDMAEMA-b-PLA3:Tram-34 | Heating | pH=4.5            | 38.88                        | 40.47                  | 1.55                        | -22.71                                  | -                            | -                      | -                           | -                                       |
| DPPC:PDMAEMA-b-PLA4         | Heating | pH=4.5            | 40.07                        | 41.11                  | 1.18                        | -13.14                                  | -                            | -                      | -                           | -                                       |
| DPPC:PDMAEMA-b-PLA4:Tram-34 | Heating | pH=4.5            | 37.81                        | 40.08                  | 2.35                        | -21.25                                  | -                            | -                      | -                           | -                                       |
| DPPC                        | Cooling | PBS (pH=7.4)      | 40.11                        | 39.57                  | 0.97                        | 56.81                                   | -                            | -                      | -                           | -                                       |
| DPPC:Tram-34                | Cooling | PBS (pH=7.4)      | 39.84                        | 38.75                  | 1.83                        | 58.69                                   | -                            | -                      | -                           | -                                       |
| DPPC:PDMAEMA-b-PLA3         | Cooling | PBS (pH=7.4)      | 39.90                        | 39.36                  | 0.92                        | 28.30                                   | -                            | -                      | -                           | -                                       |
| DPPC:PDMAEMA-b-PLA3:Tram-34 | Cooling | PBS (pH=7.4)      | 39.29                        | 36.97                  | 3.65                        | 32.83                                   | -                            | -                      | -                           | -                                       |
| DPPC:PDMAEMA-b-PLA4         | Cooling | PBS (pH=7.4)      | 39.71                        | 39.05                  | 1.06                        | 20.77                                   | -                            | -                      | -                           | -                                       |
| DPPC:PDMAEMA-b-PLA4:Tram-34 | Cooling | PBS (pH=7.4)      | 39.36                        | 37.76                  | 2.27                        | 25.66                                   | -                            | -                      | -                           | -                                       |
| DPPC                        | Cooling | pH=4.5            | 40.27                        | 39.70                  | 1.16                        | 62.18                                   | -                            | -                      | -                           | -                                       |
| DPPC:Tram-34                | Cooling | pH=4.5            | 40.48                        | 39.64                  | 1.38                        | 40.65                                   | -                            | -                      | -                           | -                                       |
| DPPC:PDMAEMA-b-PLA3         | Cooling | pH=4.5            | 39.86                        | 39.18                  | 1.34                        | 40.09                                   | -                            | -                      | -                           | -                                       |
| DPPC:PDMAEMA-b-PLA3:Tram-34 | Cooling | pH=4.5            | 39.73                        | 38.77                  | 1.79                        | 22.79                                   | -                            | -                      | -                           | -                                       |
| DPPC:PDMAEMA-b-PLA4         | Cooling | pH=4.5            | 39.90                        | 38.96                  | 1.54                        | 17.55                                   | -                            | -                      | -                           | -                                       |
| DPPC:PDMAEMA-b-PLA4:Tram-34 | Cooling | pH=4.5            | 39.48                        | 37.49                  | 3.00                        | 22.56                                   | -                            | -                      | -                           | -                                       |
